# Supplementary material for: IceDetectNet: A rotated object detection algorithm for classifying components of aggregated ice crystals with a multi-label classification scheme
Source: Copernicus journal article supplement (doi:10.5194/egusphere-2023-2770), 2024-01-18
Supplement: Supplementary file [file egusphere-2023-2770-AC2-supplement.pdf]

## **Authors' comments to Anonymous Referee #1**

We would like to thank the reviewer for the thorough review of our manuscript and insightful feedback. These comments have significantly improved the quality of our work. In the following sections, we present the reviewer's comments (in black), our responses (in red), and the changes made in the revised manuscript (in blue).

Please note that all line numbers in our responses correspond to those in the revised manuscript.

---

### **Overall comments:**

The authors present the IceDetectNet, a new deep learning algorithm aimed at refining the classification of ice crystals, which is significant for understanding cloud properties and precipitation processes. The need for improved classification methods arises from the challenges associated with current deep learning approaches, such as the difficulty in distinguishing individual components within aggregated ice crystals and the compromise between classifying basic habits and microphysical processes. IceDetectNet attempts to address these issues by integrating a rotated object detection technique for component-specific analysis and a multi-label classification framework. The approach is innovative and classification of individual components of aggregated crystals and the related microphysical processes is an important upgrade to traditional machine learning approaches. Yet, the study contains severe limitations, which affects its generalization ability. The main shortcoming is the choice of ice crystal habit and microphysical process categories, which include specific habit categories while omitting other frequently observed ice crystal habits. Since the habit classification scheme is the backbone of this study, this should be well thought of and justified in order for the algorithm to be generalizable. It is recommended that the authors refine the the habit classification scheme and address other major concerns related to the structure of IceDetectNet before the paper can be recommended for publication.

1. The habit classes that the authors are proposing contains seven basic habits. Yet, the choice of these basic habit categories is not justified or based on classification schemes presented in the literature (e.g. Kikuchi et al., 2013; Hallett & Bailey, 2009). Some habit classes, like "CPC" or "lollipop" are rather specialized, whereas other key habit classes (especially for mixed-phase clouds), like needles, are missing. Since the manuscript is focused on identification of microphysical processes and crystal growth regimes, it would be justified to classify the crystals either as single crystals (typically encountered below  $-20^{\circ}\text{C}$ ; see Hallett & Bailey, 2009) and polycrystalline

habits (typically encountered in colder temperatures) and/or as plate-like (colder than  $-10^{\circ}\text{C}$  or warmer than  $-2^{\circ}\text{C}$ ), column-like (warmer than  $-10^{\circ}\text{C}$ ) or mixed-habits. More generalized habit classification scheme would enhance the usability of the algorithm for other campaigns.

Thank you for your thoughtful comments and for pointing out the differences of our classification approach relative to other established classification schemes, such as Hallett & Bailey (2009). The main goal of this paper is to introduce a novel technique (IceDetectNet) that can classify ice crystal components, which is not meant to be a completed/finished model including all ice habits.

Our seven basic habit categories were determined by their presence and distinct shape features observed in our dataset collected in Arctic mixed-phase clouds in NyAlesund. These basic habit classes are based on the categories used in Pasquier et al., 2022b as we used the same dataset. Following your advice, we have included an additional section in the appendix (shown below) to explain the classification criteria and rationale behind the definition of each ice category.

#### **L502-523:**

#### **Appendix B: Detailed criteria for ice crystal classification**

The classification of ice crystals into their respective basic habits and microphysical processes is a challenging task that requires a set of rules to ensure consistency and accuracy across the dataset. Here we describe the criteria used for the multi-label classification of ice crystals. We randomly select several images from each category as examples (see Fig. B2) and present the process of how we hand-label an ice crystal (see Fig. B1).

The classification process begins by using human judgment to determine whether the ice particle is an aggregate that contains more than one component. If an ice crystal is not aggregated, the classification process proceeds directly with the classification of the basic habit. For aggregated crystals, the process differs between training and evaluation of IceDetectNet. In training, each component is manually located with a bounding box (i.e. smallest rectangle box) around the component and these boxes are then classified. In multi-label classification, however, only the largest visually identified component of the aggregate will be classified without drawing a bounding box.

The next step is to classify the basic habits of the ice crystals/components. If the basic habit is not recognizable (as defined in Table,1), the size of the ice/component is assessed by eye. Small crystals are classified as 'small' and all others as 'irregular-aged'. If the basic habit is recognizable, we classify based on shape. Special shapes, like 'lollipop-aged' for lollipop-like crystals or 'frozen droplets' for those with droplet features, are classified first. Rectangular shapes with multiple branches at two sides (maximum dimension side) are labeled 'CPC-aged,' and others as 'column.' Hexagonal crystals are classified by aspect ratio: normally, a high ratio indicates a 'column,' and if a lower one with clear hexagonal patterns is a 'plate', otherwise, a 'column' again. Crystals/components that don't fit these categories are considered 'irregular-aged'.

Once the basic habit is determined, the appearance of the edges of the ice/component determines whether the ice/component is aged or not. As mentioned earlier (see section. 2) 'irregular', 'CPC', and 'lollipop-aged' are aged by default, while small is 'pristine' by definition. So we only need to decide if 'column', 'plate' and 'frozen drops' are aged or not. Usually, when an ice/component is aged, it has some tiny bumps on the edges.

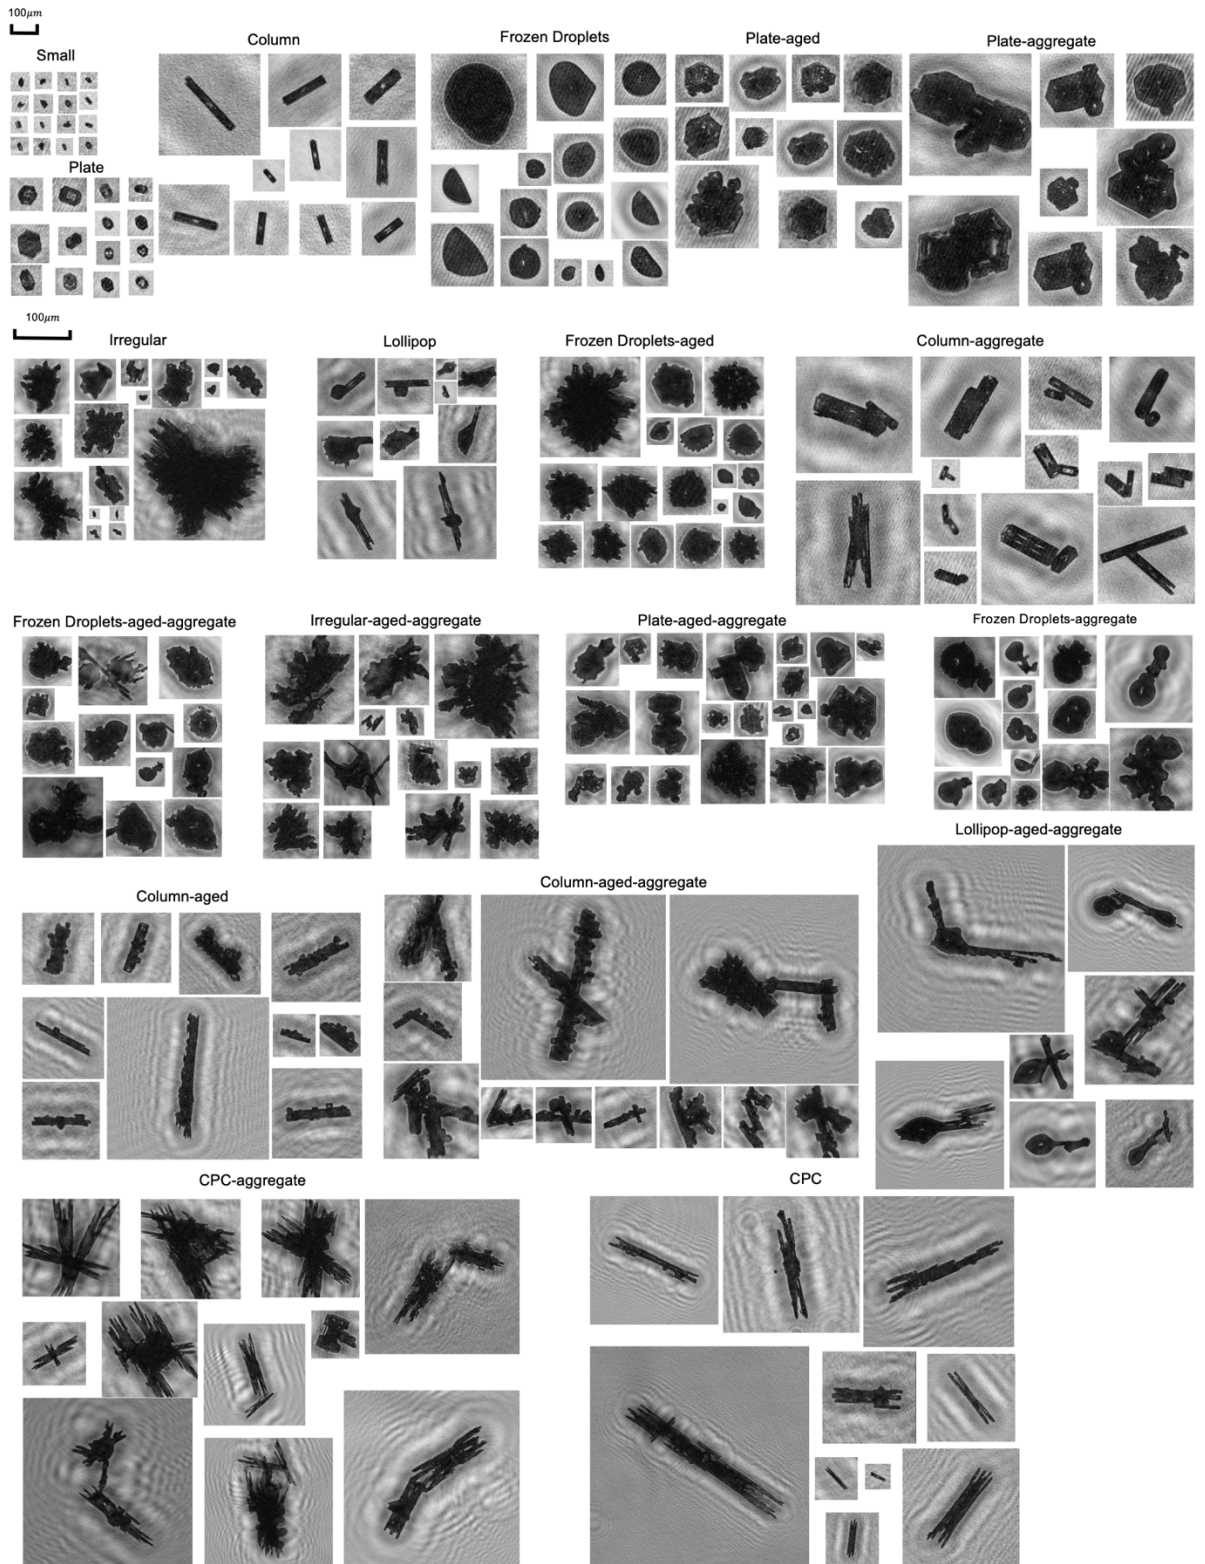

Figure 1 A randomly selected sample of ice crystal images from each category

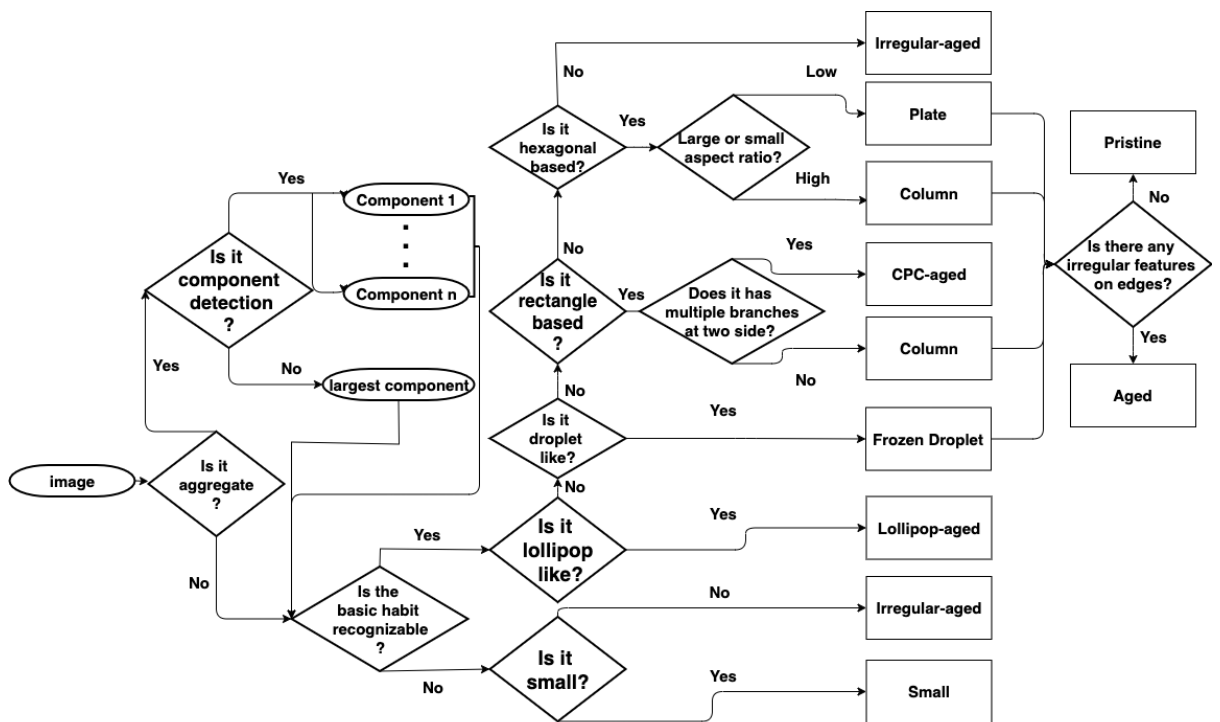

Figure 2 The process of classifying ice crystals

While we acknowledge that the 'CPC' and 'lollipop' categories may appear to be more specialized, their inclusion was intentional and aimed at understanding the microphysical processes responsible for their creation (Pasquier et al. 2023). Including these habits highlights the ability of IceDetectNet to maintain high performance on well-defined categories (i.e. column, plate), while still providing a mechanism to classify ice crystals that do not fit nicely into traditional habit classes (e.g. lollipop-aged).

We understand the critical role that a wider range of ice crystal habits, such as needles, play in mixed-phase clouds. The absence of these habits in our dataset limits the inclusion of these habits in the classification scheme and in the training and validation process of IceDetectNet. In our extended discussion (see below), we highlight the potential of fine-tuning IceDetectNet to integrate ice crystal habits that were not part of the original training set.

#### L94-99:

“For a more detailed discussion of the categorization criteria, we refer to Appendix B. However, due to data limitations, our dataset does not capture every possible basic ice habit, such as needles and rosettes. This limitation is acknowledged and further discussed in Sect.5 where we look at potential extensions to IceDetectNet. As new data containing additional ice habits become available, IceDetectNet can be updated as it is designed to incorporate these new habits through fine-tuning, ensuring the continued evolution of the model.”

#### L470-471:

“As the current dataset used for the training of IceDetectNet does not include some basic habits such as needles and rosettes, we plan to adapt IceDetectNet to include these categories once additional datasets containing these habits are available. ”

2. Small: why discriminate between small and irregular habits? Why not use an objective criteria for small, like measured maximum dimension? Tell the reason of having small and irregular.

Thank you for raising this point. The distinction between "small" and "irregular" ice crystal habits allows us to use shape information effectively, rather than simply classifying based on size. Small refers to crystals that are generally too small to accurately determine their shape, but this category also includes crystals such as small 'column' ice where the shape is still recognizable. Conversely, some larger crystals may have indistinguishable shapes.

Following your suggestions, we investigated different metrics, such as equivalent size, major axis size, minor axis size, and particle area, to identify the best threshold for defining 'small' ice crystals. The major axis dimension was found to be the most reliable measure and showed the least overlap between 'small' and the rest of the categories ice in our analyses (as shown in Fig 3).

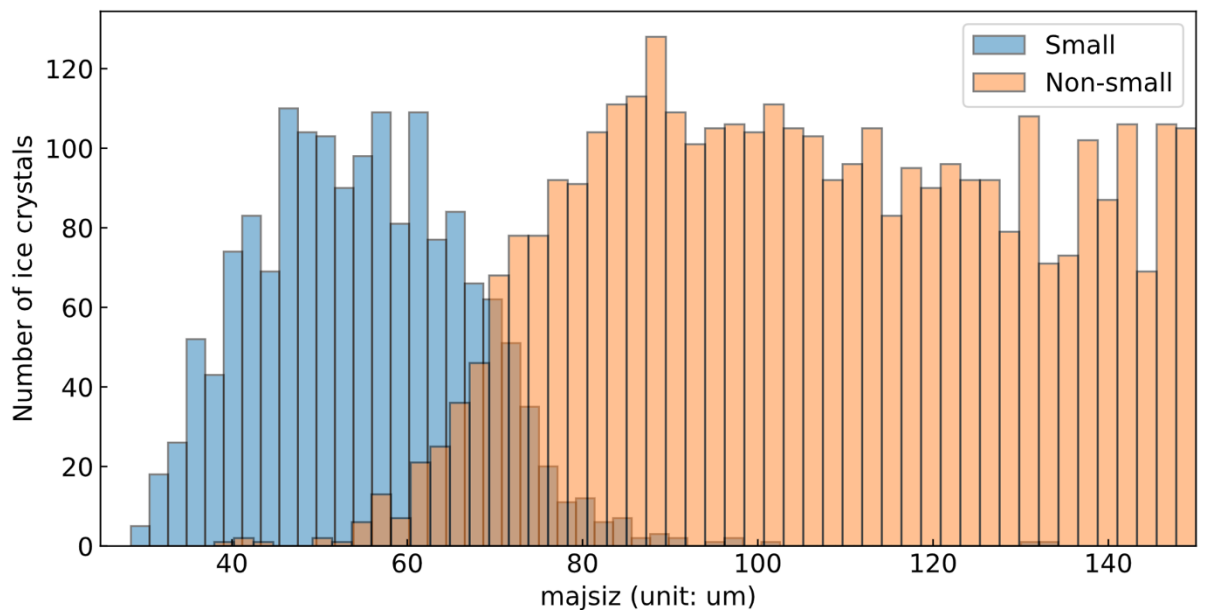

Figure 3: Histogram comparing major axis sizes of 'small' ice crystals and other categories (non-small).



We found that a threshold of 75-80  $\mu\text{m}$  allows us to keep shape information for over 80% of the ice crystals (as shown in Figure 4). However, below this threshold, some small crystals can still be detected and classified, providing insight into their shapes and contributing to our understanding of ice crystal shape. If we follow your suggestion and set a rigid threshold, the information below this threshold will be completely lost. Also, those 'small' ice larger than the threshold will be fed into the IceDetectNet and then forced to be classified into a certain class, which would lead to some confusion for the IceDetectNet.

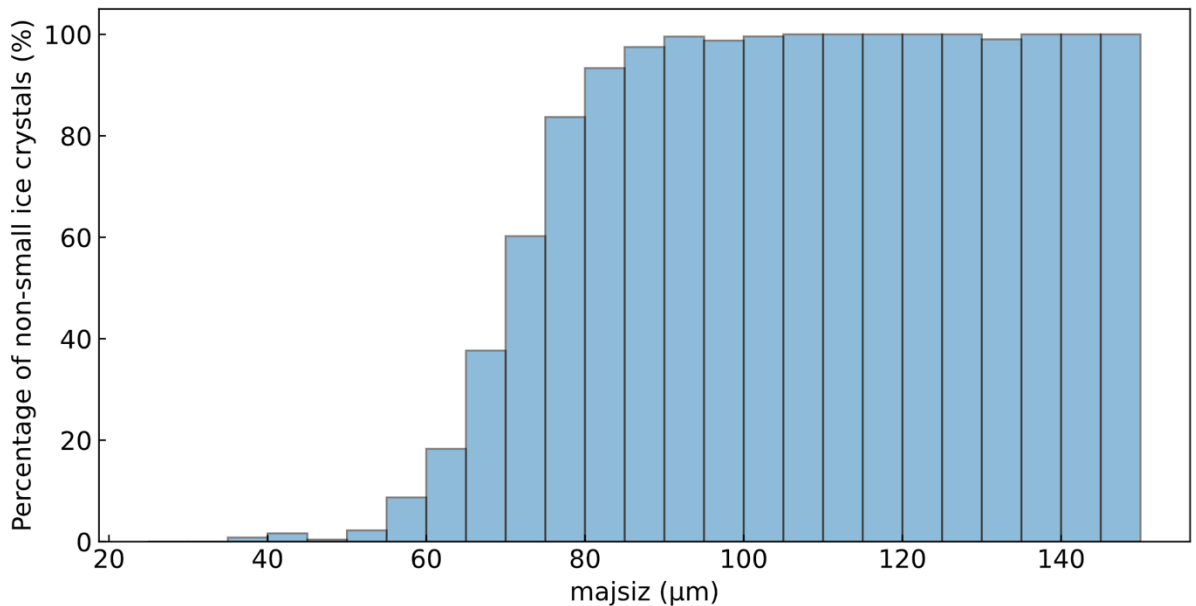

Figure 4 Histogram of non-small ice crystals as a percentage of total ice crystals (small + non-small) by major axis size.

Therefore, based on this assessment, we retain the current classification without imposing a fixed size threshold for 'small' crystals. This approach ensures that our model utilizes the full range of available data. In the future, we may consider implementing a 75-micron threshold to further refine our classification framework based on the insights gained from the current analysis.

3. Pristine: The definition of pristine, that the authors are presenting, is too broad. According to this definition, any ice crystal that is not rimed, sublimated or aggregated is classified as pristine, including polycrystalline habits or other highly complex shapes. Korolev et al. (1999) defined pristine ice as “faceted single ice crystals”. The authors should adopt a similar narrower definition.

Thank you for pointing this out and we agree that our definition was not very clear before. Here we only define pristine as 'column', 'plate', 'frozen droplet' and 'small' ice crystals, as detailed in Table 1. To make this clearer we have

added a section to the appendix of our manuscript (see Question 1 [Appendix B: Detailed criteria for ice crystal classification](#)). Also, we added one more definition sentence in the Section 2 Data description (see below).

**L93-94:**

“Furthermore, all ice crystals in the classes 'lollipop', 'CPC' and 'irregular' are defined as aged ice instead of pristine ice (as they are not newly-produced ice) while they are still basic habit categories.”

4. Aged: It is more precise to categorize ice crystals based on their physical state as "rimed" or "sublimated" rather than using the term "aged," which does not directly correlate with a specific physical transformation.

We recognize the importance of accurately categorizing ice crystals into 'rimed' or 'sublimated' states. However, the distinction between 'rimed' and 'sublimated' states is not always clear within a dataset and requires the interpretation of a researcher (see example images below). Therefore, here we use 'aged' as a merged category to avoid potential misclassifications by IceDetectNet. In doing so, it allows researchers the flexibility to perform in-depth physical analyses tailored to their specific needs. For example, a researcher can further classify the 'aged' category predicted by IceDetectNet into "riming" or "sublimated" when considering additional data such as meteorological or microphysical conditions for physical interpretation.

To help clarify these categories, we have included a sample image section in the appendix to provide a better overview of the dataset. The same as above: [Appendix B: Detailed criteria for ice crystal classification](#)

5. The manuscript prompts concerns regarding the precision of manual classification processes employed. Ensuring the accuracy of training and test datasets is crucial for the success of deep learning methodologies. A case in point is the classification of a crystal in Figure 3 as CPC, despite the absence of plate-like features, and its closer resemblance to a needle structure. Given that CPC crystals suggest a transitional phase between columnar and plate growth regimes, as discussed by Pasquier et al. (2023), and needle growth typically occurs at warmer temperatures around  $-5^{\circ}\text{C}$ , such misclassification could potentially lead to incorrect assumptions about the environmental conditions experienced by the crystal. To address these concerns, the authors are advised to discuss the classification criteria for each ice crystal habit more comprehensively and provide additional examples from various habit



categories. This approach would significantly enhance confidence in the accuracy of the manual labeling process.

Thanks for pointing this out and admittedly, the classification criteria for classifying ice crystals are not very clear. In response to your previous comments, we have included an additional section to the appendix (see Question 1: [Appendix B: Detailed criteria for ice crystal classification](#)) that outlines the criteria for classifying the ice crystals, including some randomly selected crystals as examples.

6. The manuscript introduces three distinct classification frameworks: multi-label classification, basic habit identification, and microphysical process categorization. In addition, it explores a rotated object detection algorithm for discerning aggregates and their respective components. However, the integration and mutual dependencies among these classification strategies are not clearly articulated, leaving the reader uncertain about how the results from these different schemes are interrelated. A particularly crucial element of the research is the aggregate detection capability, where the method for identifying aggregates through bounding boxes is noted to be quite effective, boasting an accuracy rate of 92% as detailed in Section 4.1.1. Conversely, Table 2 reveals a significantly lower accuracy rate of only 50.3% for the multi-label classification scheme in recognizing aggregate classes, indicating suboptimal performance in this aspect. To address these discrepancies, it is recommended that the authors consider implementing a sequential classification approach. This would entail initially employing the rotated object detection algorithm to differentiate between aggregate and non-aggregate forms, followed by the classification of the individual crystals' habits, and culminating with the identification of the microphysical processes involved.

Thank you for pointing this out and we now realize that the differences among multi-label classification, basic habit identification, and microphysical process categorization are not very clear to the readers. Thus, in the added new section in the appendix (see Question 1: [Appendix B: Detailed criteria for ice crystal classification](#)), we also added a diagram of how we do the hand-label in basic habit and microphysical processes and how to combine both of the information. To clarify, the 92% shown in Section 4.1.1 is classifying whether the ice is aggregated (with more than one bounding box predicted) or single\_(with 1 bounding box predicted only), which is for evaluating the performance of detection. However, the 50.3% in Table 2 shows how well we could classify these aggregated ice crystals in basic habits and microphysical

processes, which includes both detection (e.g. whether multiple were detected for aggregate ice) and classification (e.g. whether the basic habit is classified correctly). They are two different level tasks in difficulty and the latter one is much more difficult than the first one.

7. The authors have decided to separate the training and test data sets to different temperature regimes. The reasoning behind this is that the test and training datasets will have different characteristics. Consequently, it is challenging to assess the algorithm's generalization capability across unrepresented habits in the test dataset, such as frozen droplet, CPC, lollipop, and their aged and aggregated forms. Typically, it is advisable for both the training and test datasets to encompass all classes to ensure a comprehensive evaluation of the algorithm's performance. The authors might want to reconsider their approach regarding the selection of training and test datasets or reevaluate the defined habit classes in light of these concerns. Additionally, the representation of some classes within the training dataset, such as column aggregate, is insufficiently robust for effective training. It may be beneficial to exclude classes with inadequate sample sizes to improve the reliability and validity of the classification outcomes.

We completely agree that the description of the training, test and validation sets was confusing as well as how the training dataset was divided into the splits. With this in mind, we have renamed the test dataset to generalization dataset, explicitly described the division of the training set, and updated the main text accordingly:

**L100-106:**

“The dataset collected on November 11, 2019 (Pasquier et al., 2022b), hereafter training dataset, was used to train IceDetectNet. During the training it was divided into a training subset (comprising 80% of the data) and a validation subset (made up of the remaining 20%), using a cross-validation method (detailed introduction in Sect. 3.8.1). This validation subset serves a similar purpose as the traditional test sets used in other studies (Jaffeux et al., 2022; Xiao et al., 2019; Touloupas et al., 2020), providing an initial evaluation of the model's performance under known conditions. On the other hand, the generalization dataset was collected on a different date, April 1, 2020 (Pasquier et al., 2022b) which is not used during training but to evaluate the generalization abilities of IceDetectNet.”

To clarify, here we use two different and independent datasets: a training dataset, and a generalization dataset, each of which serves different purposes and is collected during different seasons.

1. Training datasets: We split our training data into two subsets: 80% for training and 20% for validation. The training subset helps the model learn data patterns, while the validation subset checks its effectiveness on unseen data to ensure good generalization. We also use a 5-fold cross-validation method to prevent overfitting by dividing the data set into five equal parts. Each cross-validation cycle uses four parts for training and one for validation, alternating so that each part serves as validation data once.

2. Generalization dataset: The generalization dataset is separate from the training process. It is designed to evaluate the model's ability to generalize across different environmental conditions, especially those not represented in the training dataset. This dataset was intentionally collected under significantly different conditions (from -23 to -15°C) to challenge the model with ice particle types that may not be present in the training data. We acknowledge that this dataset does not include classes such as 'lollipop' or 'CPC' due to their absence under the specific conditions and seasons of collection.

Regarding the exclusion of classes with insufficient sample sizes, the real data distribution in our current datasets reflects the actual presence of different ice shapes under specific conditions and seasons. Excluding classes due to insufficient numbers could bias the model away from these realities. Furthermore, each additional data image contributes valuable information that enhances model learning, making the inclusion of all available data critical. Recognizing the limitations of the current dataset in representing all possible ice habits, especially underrepresented or missing categories, we plan to use fine-tuning methods for upcoming new datasets, as detailed in the extended discussion section (see Question 1: [Appendix B: Detailed criteria for ice crystal classification](#)).

8. The performance of the training dataset is well discussed and shown in Figs. 4-7. The performance of the test dataset is only shortly discussed in Sec. 4.3. Figure 8c shows the overall performance of basic habits, microphysical processes, and all-classes but no detailed results for the different classes are shown similar the training dataset (Figs. 5 and 6).

Thanks for pointing this out. We have now included the confusion matrix plots for the generalization dataset and added the analysis on the plots as follows:

[L433-456:](#)

“To gain further insights into IceDetectNet's performance in each ice category, here we analyzed the confusion matrices (mean of 5 models) for basic habit classification (Fig.9) and microphysical processes classification (Fig.10) for the generalization dataset as well.

IceDetectNet achieved an overall accuracy of 81% for the basic habit categories (Fig.9) The confusion matrix shows that IceDetectNet still performed better for the ice categories that comprise a large fraction of the dataset, like 'small' (precision of 90%). However, among these, 'column' classification performance had a large performance drop (18% decrease in precision compared to the training dataset), and its two main misprediction sources were 'irregular' and 'plate', which almost represent all the mispredictions (29%). This could be due to the data distribution shift from 'column' to 'plate'. Under the general decrease trend among all categories, 'irregular' surprisingly has a 10% increase in precision. The main misprediction of 'irregular' comes from 'column' in both the training dataset and generalization data, which could be the reason that IceDetectNet learned many column features in the training dataset and thus distributed higher weights on these column features. While the number of 'column' is much less in the generalization dataset and thus leads to better performance in classifying 'irregular'. For the missing categories like 'lollipop' and 'CPC' that had zero actual occurrences, IceDetectNet still predicted 113 ice as 'lollipop' and 50 as 'CPC', with most misclassifications as 'irregular'. This problem is likely due to the model's handling of sparse data and its tendency to fit 'irregular' into these less common categories, since 'irregular' learned the most complex features since any unrecognizable shape is 'irregular'.

For the microphysical processes category (Fig.10), IceDetectNet achieved an overall accuracy of 73% (with a 9% drop compared to the training dataset). The model still performed well in identifying 'pristine' ice crystals (82%). In contrast, it shows a better performance in predicting 'aggregate' (17% higher than in the training dataset) and 'aged-aggregate' (7% higher than in the training dataset) ice crystals. This could be due to the changes in the data distribution, especially the changes in the aggregate fraction from 12% in the training dataset to 37.7% in the generalization dataset, which further emphasizes the importance of the balance of the dataset. After checking the main source of misprediction, we can see that underdetection still plays an important role, for example, the main source of misprediction of 'aggregate' is 'pristine', which is a typical misprediction problem.”

**Confusion matrix**

|                  |               |                              |                          |                            |                              |                          |                              |                              |
|------------------|---------------|------------------------------|--------------------------|----------------------------|------------------------------|--------------------------|------------------------------|------------------------------|
| <b>Predicted</b> | Column        | 1751.0<br>71.64%             | 0.2<br>0.87%             | 787.4<br>11.50%            | 242.4<br>13.77%              | 55.8<br>1.65%            | <b>2836</b><br><b>61.72%</b> |                              |
|                  | CPC           | 17.0<br>0.70%                |                          | 31.6<br>0.46%              | 2.2<br>0.12%                 | 1.8<br>0.05%             | <b>52</b><br><b>0.00%</b>    |                              |
|                  | Droplet       | 7.0<br>0.29%                 | 13.4<br>58.26%           | 29.6<br>0.43%              | 19.0<br>1.08%                | 1.8<br>0.05%             | <b>70</b><br><b>18.93%</b>   |                              |
|                  | Irregular     | 418.6<br>17.13%              | 4.8<br>20.87%            | 5627.2<br>82.16%           | 242.6<br>13.78%              | 227.2<br>6.71%           | <b>6520</b><br><b>86.30%</b> |                              |
|                  | Lollipop      | 7.4<br>0.30%                 |                          | 84.2<br>1.23%              | 2.8<br>0.16%                 | 18.6<br>0.55%            | <b>113</b><br><b>0.00%</b>   |                              |
|                  | Plate         | 229.6<br>9.39%               | 4.6<br>20.00%            | 147.4<br>2.15%             | 1237.4<br>70.31%             | 27.6<br>0.82%            | <b>1646</b><br><b>75.15%</b> |                              |
|                  | Small         | 13.4<br>0.55%                |                          | 142.0<br>2.07%             | 13.6<br>0.77%                | 3051.6<br>90.17%         | <b>3220</b><br><b>94.75%</b> |                              |
|                  | Sum_predicted | <b>2444</b><br><b>71.64%</b> | <b>0</b><br><b>0.00%</b> | <b>23</b><br><b>58.26%</b> | <b>6849</b><br><b>82.16%</b> | <b>0</b><br><b>0.00%</b> | <b>1760</b><br><b>70.31%</b> | <b>3384</b><br><b>90.17%</b> |
|                  | Column        | CPC                          | Droplet                  | Irregular                  | Lollipop                     | Plate                    | Small                        | Sum_actual                   |
| <b>Actual</b>    |               |                              |                          |                            |                              |                          |                              |                              |

Figure 5 Similar confusion matrix as Fig. 5 in the manuscript, but for generalization dataset. Class 'CPC' and 'Lollipop' are missing in the dataset and thus are 0 in its corresponding column.

Confusion matrix

|           |                |                              |                              |                              |                              |                               |
|-----------|----------------|------------------------------|------------------------------|------------------------------|------------------------------|-------------------------------|
| Predicted | Pristine       | 6479.4<br>82.29%             | 207.0<br>18.39%              | 704.6<br>20.76%              | 136.8<br>6.62%               | <b>7527</b><br><b>86.07%</b>  |
|           | Aged           | 559.8<br>7.11%               | 730.8<br>64.91%              | 101.0<br>2.98%               | 306.4<br>14.82%              | <b>1698</b><br><b>43.04%</b>  |
|           | Aggregate      | 690.8<br>8.77%               | 48.6<br>4.32%                | 2172.8<br>64.01%             | 462.6<br>22.38%              | <b>3374</b><br><b>64.38%</b>  |
|           | Aged_Aggregate | 143.6<br>1.82%               | 139.4<br>12.38%              | 416.0<br>12.26%              | 1161.2<br>56.18%             | <b>1860</b><br><b>62.42%</b>  |
|           | Sum_predicted  | <b>7873</b><br><b>82.29%</b> | <b>1125</b><br><b>64.91%</b> | <b>3394</b><br><b>64.01%</b> | <b>2067</b><br><b>56.18%</b> | <b>14460</b><br><b>72.92%</b> |
|           |                | Pristine                     | Aged                         | Aggregate                    | Aged_Aggregate               | Sum_actual                    |
|           |                | Actual                       |                              |                              |                              |                               |

Figure 6 Similar confusion matrix as Fig. 6 in manuscript, but for generalization dataset

9. Table 2: since the classes are highly imbalanced, overall accuracy is not necessarily the best performance metric. Other performance metrics, such as balanced accuracy or F1-score could work better.

This is a good point and we have now included the F1 score for each class, the mean F1 score and its standard deviation in Table 2 and Table 3 for a more comprehensive overview of the model performance.



**Table 2.** Overall accuracy of the multi-label, basic habit and microphysical processes ice classification. The table displays the overall accuracy values for each of the five models, along with the mean and standard deviation (std) values (all values are reported in percentages). The validation set is broken down into 'aggregate' (agg) and 'non-aggregate' (non-agg) subsets.

|                                |                            | 1    | 2    | 3    | 4    | 5    | mean OA     | mean F1 score | std-OA | std-F1 |
|--------------------------------|----------------------------|------|------|------|------|------|-------------|---------------|--------|--------|
| <b>Multi-label</b>             | <b>All data (19-class)</b> | 78.1 | 78.0 | 78.3 | 77.0 | 79.4 | <b>78.2</b> | <b>54.9</b>   | 0.9    | 1.9    |
|                                | Non-agg (10-class)         | 82.5 | 81.3 | 81.3 | 83.5 | 82.0 | 82.1        | 71.7          | 0.9    | 1.6    |
|                                | Agg (9-class)              | 46.1 | 53.7 | 54.4 | 47.0 | 50.5 | 50.3        | 41.4          | 3.8    | 5.9    |
| <b>Basic Habit</b>             | <b>All data (7-class)</b>  | 86.5 | 86.5 | 86.3 | 85.6 | 87.2 | <b>86.4</b> | <b>78.8</b>   | 0.6    | 1.3    |
|                                | Non-agg (7-class)          | 89.4 | 90.0 | 89.4 | 88.8 | 90.7 | 89.7        | 81.8          | 0.7    | 1.3    |
|                                | Agg (6-class)              | 71.7 | 76.1 | 72.6 | 70.7 | 71.3 | 72.5        | 58.5          | 2.1    | 3.4    |
| <b>Microphysical Processes</b> | <b>All data (4-class)</b>  | 81.4 | 82.0 | 81.3 | 80.8 | 82.6 | <b>81.6</b> | <b>66.9</b>   | 0.7    | 1.1    |
|                                | Non-agg (2-class)          | 85.6 | 84.0 | 84.6 | 84.7 | 86.2 | 85.0        | 84.3          | 0.9    | 1.0    |
|                                | Agg (2-class)              | 48.9 | 55.0 | 56.1 | 48.3 | 52.4 | 52.1        | 62.3          | 3.5    | 2.8    |

**Table 3.** Overall accuracy of the multi-label, basic habit and microphysical processes ice classification. The table displays the overall accuracy values for each of the five models, along with the mean and standard deviation (std) values (all values are reported in percentages). The generalization dataset is broken down into 'aggregate' and 'non-aggregate' subsets.

|                                |                            | 1    | 2    | 3    | 4    | 5    | mean OA      | mean F1 score | std-OA     | std-F1     |
|--------------------------------|----------------------------|------|------|------|------|------|--------------|---------------|------------|------------|
| <b>Multi-label</b>             | <b>All data (14-class)</b> | 67.5 | 66.7 | 67.2 | 67.5 | 68.3 | <b>67.5</b>  | <b>48.5</b>   | <b>0.6</b> | <b>1.6</b> |
|                                | Non-agg (8-class)          | 72.8 | 73.3 | 71.2 | 74.5 | 73.2 | 73.0         | 58.3          | 1.2        | 2.0        |
|                                | Agg (6-class)              | 46.3 | 50.0 | 53.1 | 47.7 | 51.2 | 49.7         | 45.4          | 2.7        | 1.4        |
| <b>Basic habit</b>             | <b>All data (7-class)</b>  | 81.6 | 79.9 | 79.6 | 80.7 | 81.3 | <b>80.6</b>  | <b>68.7</b>   | <b>0.8</b> | <b>0.6</b> |
|                                | Non-agg (5-class)          | 86.4 | 85.9 | 85.4 | 84.8 | 86.7 | 85.9         | 70.3          | 0.7        | 0.8        |
|                                | Agg (5-class)              | 64.7 | 69.1 | 65.3 | 69.6 | 71.7 | 68.1         | 61.0          | 2.9        | 1.7        |
| <b>Microphysical processes</b> | <b>All data (4-class)</b>  | 72.8 | 72.3 | 72.5 | 72.9 | 73.4 | <b>72.77</b> | <b>64.8</b>   | <b>0.4</b> | <b>0.3</b> |
|                                | Non-agg (2-class)          | 78.5 | 78.0 | 77.4 | 78.1 | 77.3 | 77.8         | 74.6          | 0.5        | 0.8        |
|                                | Agg (2-class)              | 45.2 | 51.1 | 50.9 | 46.6 | 48.4 | 48.4         | 67.9          | 2.6        | 0.6        |

10. Line 4: can you change “density” to “effective density”

Changed, thanks.

11. Lines 30-32: it is also possible that ice crystals change environment in convective systems or by precipitation, which can lead to formation of mixed habits.

Rephrased:

**L29-32:**

“meteorological ..... The change in the ambient environment, such as in a convective system, leads to a complex basic habit such as columns on capped columns (CPCs) (observed by (Pasquier et al., 2023)).”

12. Lines 35-36: Schmitt & Heymsfield (2014) defined a complexity parameter to discriminate between single crystals and aggregates. This work could be also cited.

Cited, thanks

13. Lines 49-52: There are multiple studies investigating the habits (pristine or single habits vs irregular habits) of mixed-phase or cirrus clouds besides that of Korolev et al. (1999). It is advised to give a broader overview of these observations.

We added

L56-60:

“Moreover, in stratiform clouds, Korolev et al. (2000) found that 84% of the ice crystals are irregular, which includes everything except needles and dendrites. These irregular ice crystals would either be aged or aggregated by our definition (refer Sect. 2 and Sect. B).”

However, it is important to clarify that the primary focus here is to highlight the potential loss of information when basic habits and microphysical processes are not considered simultaneously.

14. Line 273: How did the different folds perform?

We have reported the standard deviations for the model's performance across the 5 folds in Table 2 and Table 3. The relatively small OA standard deviations (below 1%) indicate that the performance of the model is consistent across all folds. Therefore, for conciseness and clarity, we have not included the performance of each fold everywhere, as the variations are minimal.

**Reference:**

Cunningham R M. Analysis of particle spectral data from optical array (PMS) 1D and 2D sensors[C]//AMS 4th Symposium on Meteorol. Obs. Instruments. 1978: 10-14.

Durore C, Larsen H R, Isaka H, et al. 2D image population analysis[J]. Atmospheric research, 1994, 34(1-4): 195-205.

Korolev A, Isaac G A, Hallett J. Ice particle habits in stratiform clouds[J]. Quarterly Journal of the Royal Meteorological Society, 2000, 126(569): 2873-2902.

Pasquier, J. T., Henneberger, J., Ramelli, F., Lauber, A., David, R. O., Wieder, J., Carlsen, T., Gierens, R., Maturilli, M., and Lohmann, U.:  
Conditions favorable for secondary ice production in Arctic mixed-phase clouds,  
*Atmospheric Chemistry and Physics*, 22, 15 579–15 601,2022b.

Pasquier, J. T., Henneberger, J., Korolev, A., Ramelli, F., Wieder, J., Lauber, A., Li,  
G., David, R. O., Carlsen, T., Gierens, R., et al.:  
Understanding the history of two complex ice crystal habits deduced from a  
holographic imager, *Geophysical Research Letters*, 50,  
e2022GL100 247, 2023

Schmitt C G, Heymsfield A J. Observational quantification of the separation of simple  
and complex atmospheric ice particles[J]. *Geophysical Research Letters*, 2014,  
41(4): 1301-1307.
